# Supplementary material for: Insight into both coverage and surface structure dependent CO adsorption and activation on different Ni surfaces from DFT and atomistic thermodynamics
Source: Royal Society of Chemistry journal article supplement (doi:10.1039/c6cp01689h), 2016-01-01

## Supplementary material

# Insight into both Coverage and Surface Structure Dependent CO Adsorption and Activation on Different Ni Surfaces From DFT and Atomistic Thermodynamics

*Xiaobin Hao<sup>a</sup> Baojun Wang<sup>a,\*</sup> Qiang Wang<sup>b</sup> Riguang Zhang<sup>a,\*</sup> Debao Li<sup>b</sup>*

<sup>a</sup> Key Laboratory of Coal Science and Technology of Ministry of Education and Shanxi Province, Taiyuan University of Technology, Taiyuan 030024, Shanxi, P.R. China

<sup>b</sup> State Key Laboratory of Coal Conversion, Institute of Coal Chemistry, Chinese Academy of Sciences, Taiyuan 030001, Shanxi, PR China

---

\* Corresponding author at: No. 79 Yingze West Street, Taiyuan 030024, China. Tel.: +86 351 6018239; Fax: +86 351 6041237  
E-mail address: [wangbaojun@tyut.edu.cn](mailto:wangbaojun@tyut.edu.cn) (Baojun Wang); [zhangriguang@tyut.edu.cn](mailto:zhangriguang@tyut.edu.cn) (Riguang Zhang)

## Part 1. Thermodynamic Correction

For the stepwise CO adsorption at different coverage, the stepwise CO adsorption free energy correction  $\Delta E_{ads}(\text{correction})$  is defined by the following equation:

$$\parallel E_{ads}(\text{correction}) = (E_{ZPE} + U^\theta - TS^\theta)_{CO\ n+1/\text{slab}} - \left[ (E_{ZPE} + U^\theta - TS^\theta)_{CO\ n/\text{slab}} + (E_{ZPE} + H^\theta - TS^\theta)_{CO} \right]$$

On the other hand, for the stepwise CO dissociation process, the dissociation free energy barrier correction  $\Delta E_a(\text{correction})$  is defined by the following equation:

$$\parallel E_a(\text{correction}) = (E_{ZPE} + U^\theta - TS^\theta)_{TS} - (E_{ZPE} + U^\theta - TS^\theta)_{IS}$$

The dissociation reaction free energy correction  $\Delta E_{dis}(\text{correction})$  is defined by the following equation:

$$\parallel E_{dis}(\text{correction}) = (E_{ZPE} + U^\theta - TS^\theta)_{FS} - (E_{ZPE} + U^\theta - TS^\theta)_{IS}$$

**Table S1** The stepwise CO adsorption energies (eV) for the most stable adsorption configurations of CO on Ni surfaces at different coverage with and without the dispersion correction. Zero-point energy corrections, thermal energy corrections and entropies are not included.

| Method | Surface | nCO   |       |       |       |       |       |       |       |       |
|--------|---------|-------|-------|-------|-------|-------|-------|-------|-------|-------|
|        |         | 1     | 2     | 3     | 4     | 5     | 6     | 7     | 8     | 9     |
| DFT    | Ni(111) | -1.93 | -1.92 | -1.87 | -1.47 | -1.12 | -0.86 | -0.16 | -0.04 | 4.68  |
| DFT-D  |         | -1.93 | -1.92 | -1.87 | -1.47 | -1.12 | -0.86 | -0.16 | -0.04 | 4.68  |
| DFT    | Ni(100) | -2.01 | -1.98 | -1.91 | -1.88 | -1.68 | -1.54 | -1.46 | -1.63 | -0.51 |
| DFT-D  |         | -2.01 | -1.97 | -1.92 | -1.88 | -1.68 | -1.54 | -1.46 | -1.64 | -0.51 |
| DFT    | Ni(110) | -1.83 | -1.82 | -1.76 | -1.83 | -1.72 | -1.76 | -1.50 | -1.33 | -1.42 |
| DFT-D  |         | -1.83 | -1.82 | -1.76 | -1.83 | -1.72 | -1.76 | -1.51 | -1.33 | -1.42 |

**Table S2** The test results about the effect of vacuum thickness, supercell size and slab layers on the energy of the single CO molecule on different Ni(111), (100) and (110) surface models. Zero-point energy corrections, thermal energy corrections and entropies are not included.

| Ni(111) surface models |                                 |                         | $E_{\text{ads}}/\text{eV}$ |
|------------------------|---------------------------------|-------------------------|----------------------------|
| Vacuum thickness       | <b>10 Å</b>                     | 4 layers- $p(3\times3)$ | -1.93                      |
|                        | 12 Å                            |                         | -1.93                      |
|                        | 15 Å                            |                         | -1.92                      |
| Slab thickness         | 3 layers                        | $p(3\times3)$ -10 Å     | -1.82                      |
|                        | <b>4 layers</b>                 |                         | -1.93                      |
|                        | 5 layers                        |                         | -1.96                      |
| Supercell size         | <b><math>p(3\times3)</math></b> | 4 layers-10 Å           | -1.93                      |
|                        | $p(3\times4)$                   |                         | -1.95                      |
|                        | $p(4\times4)$                   |                         | -1.96                      |
| Ni(100) surface models |                                 |                         | $E_{\text{ads}}/\text{eV}$ |
| Vacuum thickness       | <b>10 Å</b>                     | 4 layers- $p(3\times3)$ | -1.96                      |
|                        | 12 Å                            |                         | -1.96                      |
|                        | 15 Å                            |                         | -1.96                      |
| Supercell size         | 3 layers                        | $p(3\times3)$ -10 Å     | -2.00                      |
|                        | <b>4 layers</b>                 |                         | -2.01                      |
|                        | 5 layers                        |                         | -1.98                      |
| Slab thickness         | $p(3\times3)$                   | 4 layers-10 Å           | -1.96                      |
|                        | <b><math>p(3\times4)</math></b> |                         | -2.01                      |
|                        | $p(4\times4)$                   |                         | -2.03                      |
| Ni(110) surface models |                                 |                         | $E_{\text{ads}}/\text{eV}$ |
| Vacuum thickness       | <b>10 Å</b>                     | 4 layers- $p(3\times3)$ | -1.95                      |
|                        | 12 Å                            |                         | -1.95                      |
|                        | 15 Å                            |                         | -1.98                      |
| Supercell size         | <b><math>p(3\times3)</math></b> | 4 layers-10 Å           | -1.95                      |
|                        | $p(3\times4)$                   |                         | -1.98                      |
|                        | $p(4\times4)$                   |                         | -2.00                      |
| Slab thickness         | 4 layers                        | $p(3\times3)$ -10 Å     | -1.95                      |
|                        | <b>5 layers</b>                 |                         | -1.83                      |
|                        | 6 layers                        |                         | -1.87                      |

**Figure S1** The most stable adsorption configurations of CO, C and O atoms on Ni(111), (100) and (110) surfaces. The Ni, C and O atoms are shown in the blue, grey and red balls, respectively. Zero-point energy corrections, thermal energy corrections and entropies are not included.

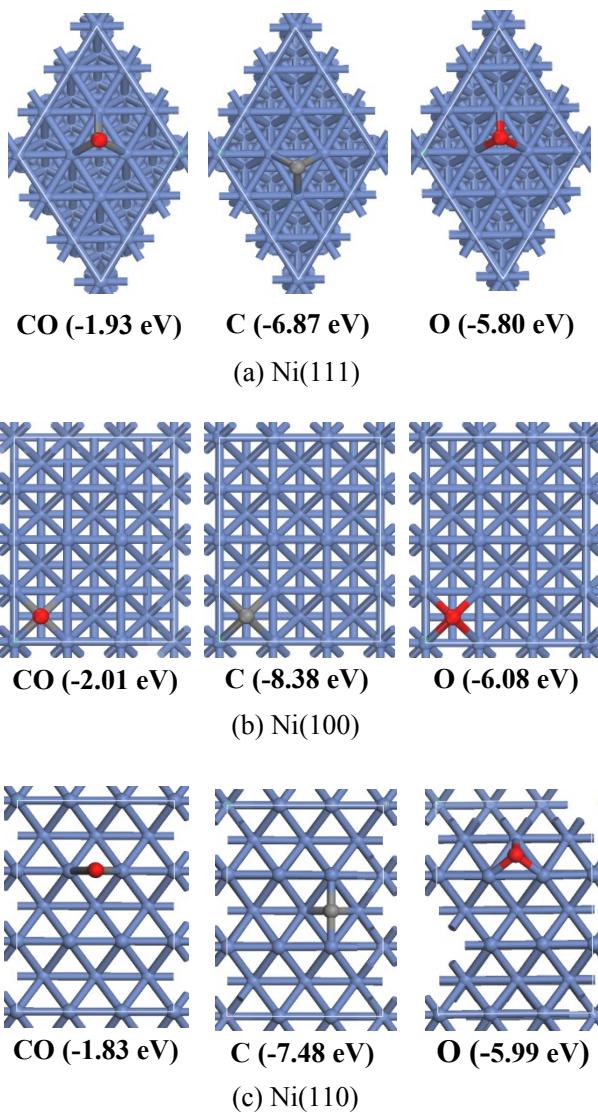

**Figure S2** The initial and optimized structures, as well as the total energy (eV) with adsorbed CO molecules on Ni(111) surface at different coverage. The blue, grey and red balls stand for Ni, C and O atoms, respectively. Zero-point energy corrections, thermal energy corrections and entropies are not included.

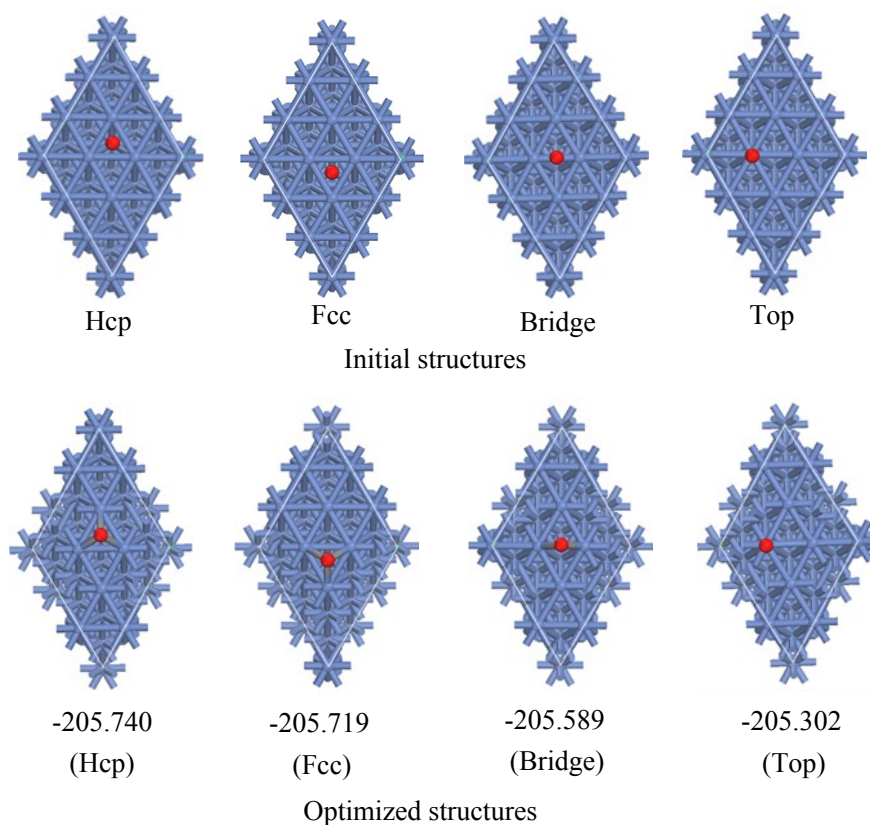

**(a)** CO Adsorption at different sites at the coverage of 1/9 ML

(1) The corresponding structures at the Hcp site

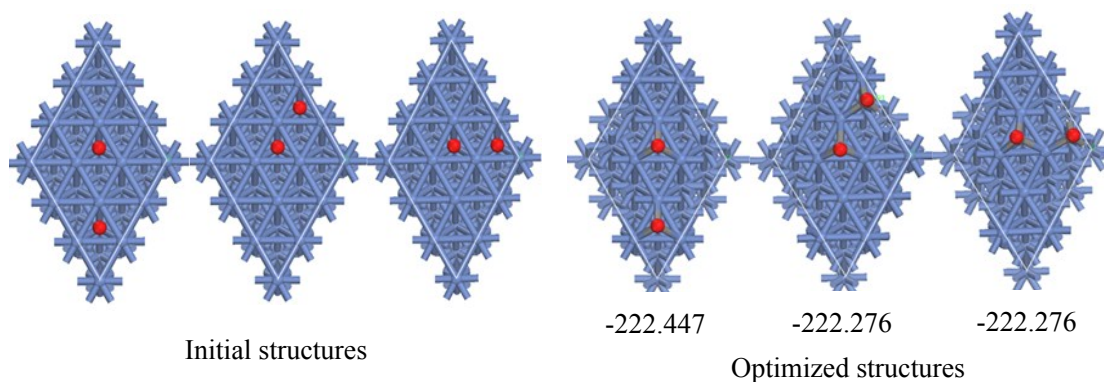

(2) The corresponding structures at the Fcc site

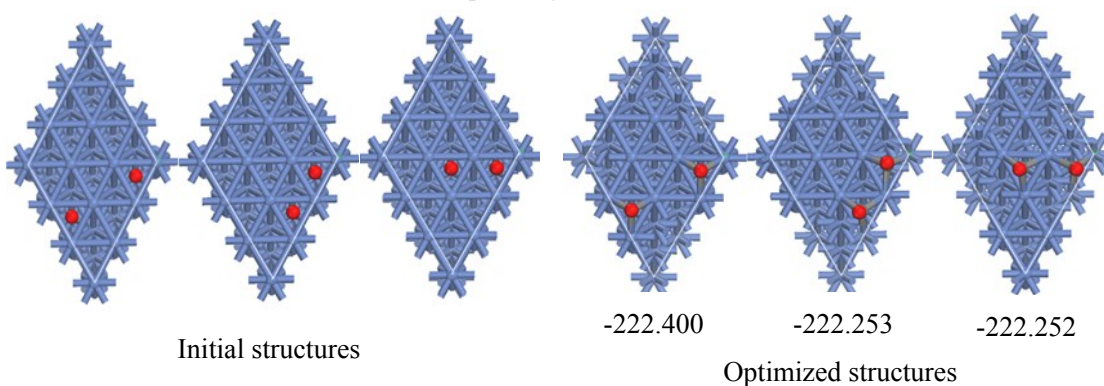

(3) The corresponding structures at the Bridge site

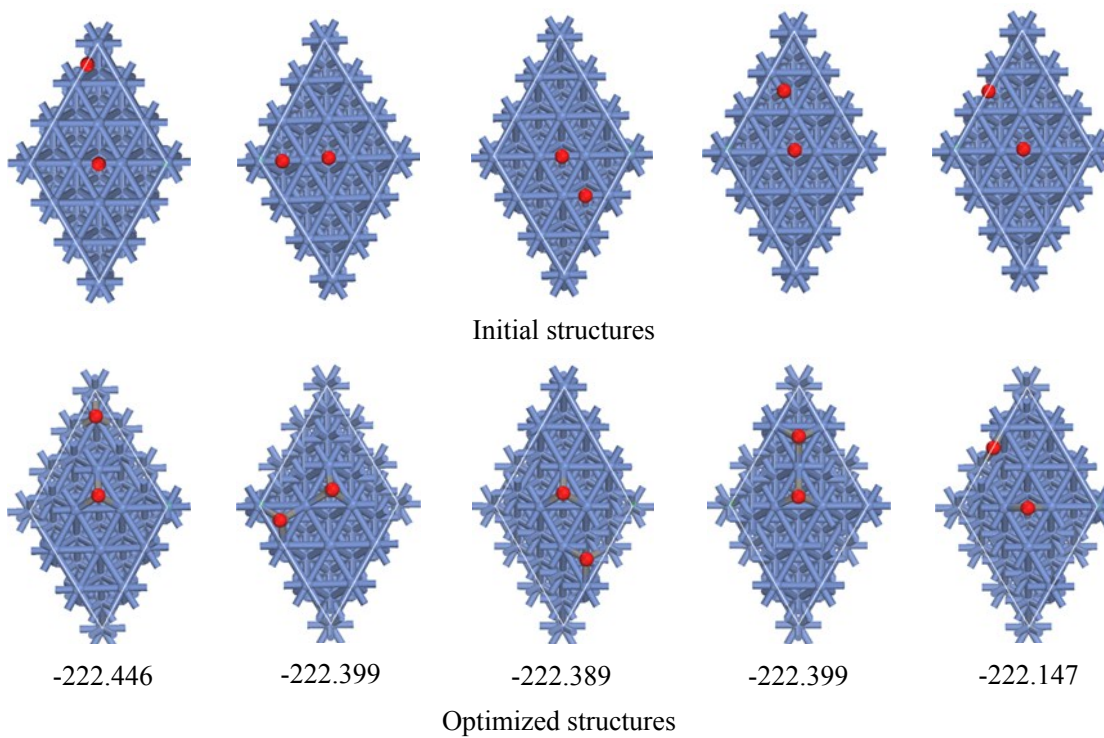

(4) The corresponding structures at the Top site

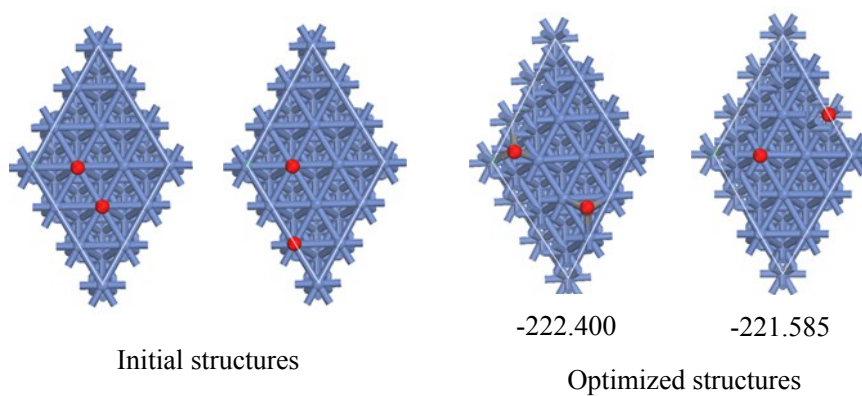

(b) CO Adsorption at different sites at the coverage of  $2/9$  ML

(1) The corresponding structures at the Hcp and Fcc site respectively

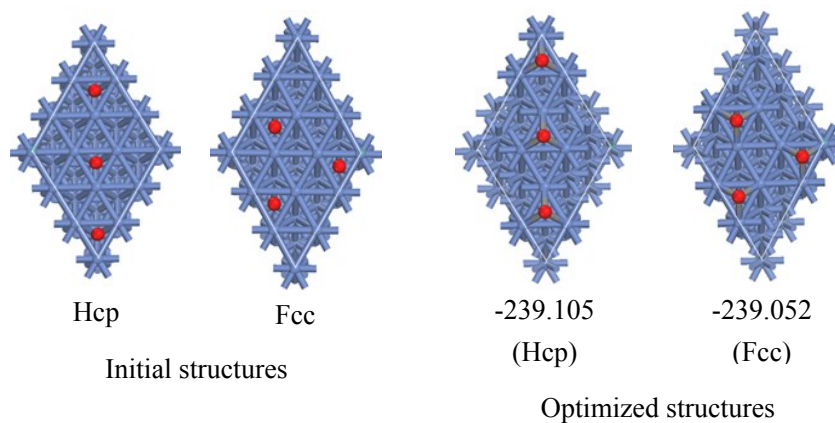

(2) The corresponding structures at the Bridge site

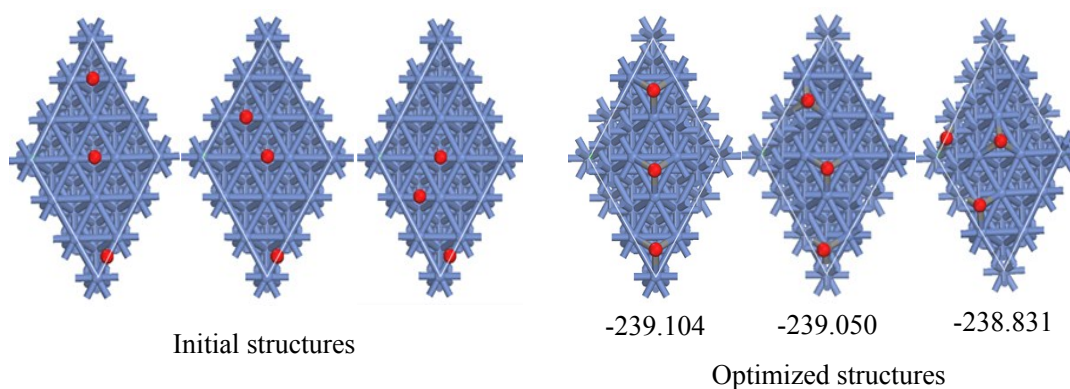

(3) The corresponding structures at the Top site

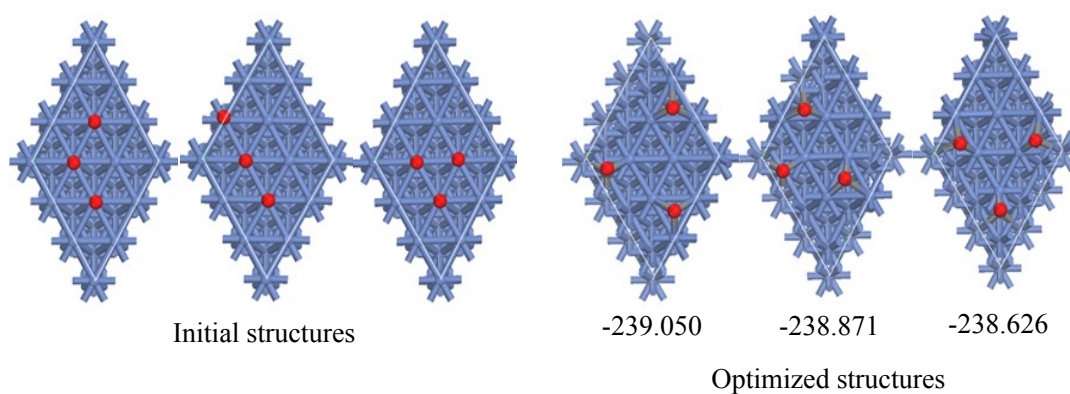

(c) CO Adsorption at different sites at the coverage of 3/9 ML

(1) The corresponding structures at the Hcp and Fcc site respectively

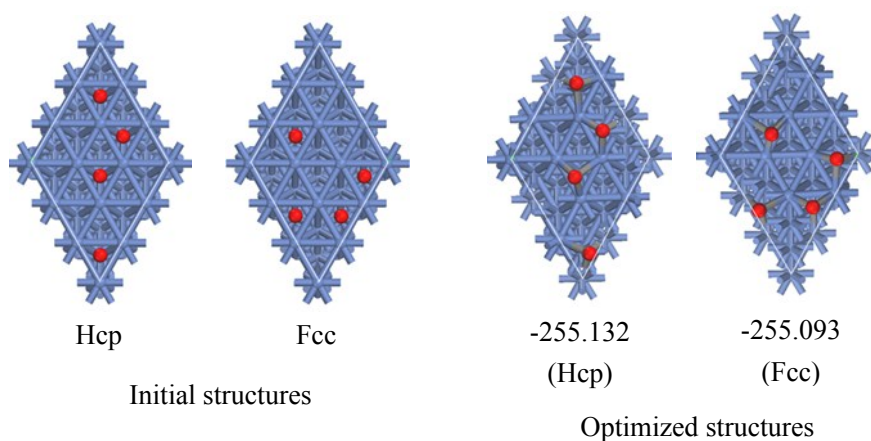

(2) The corresponding structures at the Bridge site

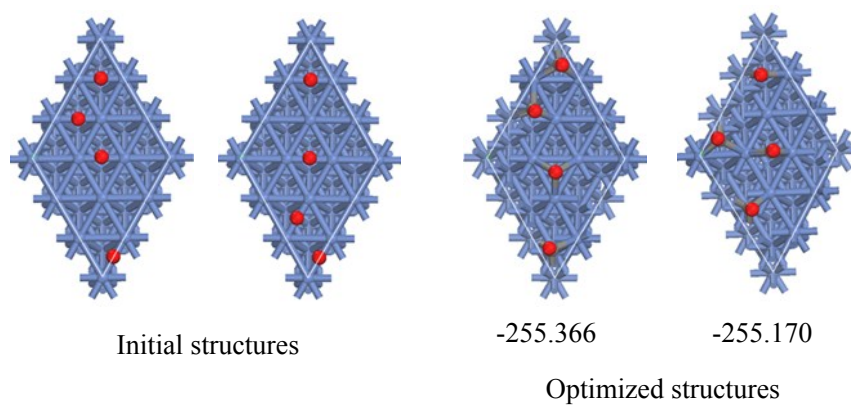

(3) The corresponding structures at the Top site

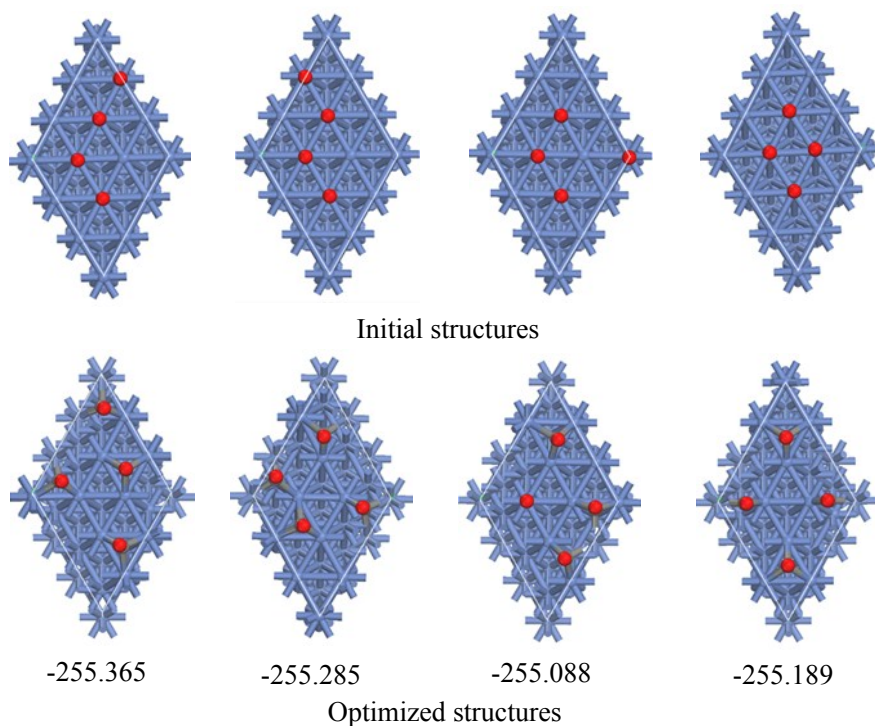

(d) CO Adsorption at different sites at the coverage of 4/9 ML

(1) The corresponding structures at the Bridge site

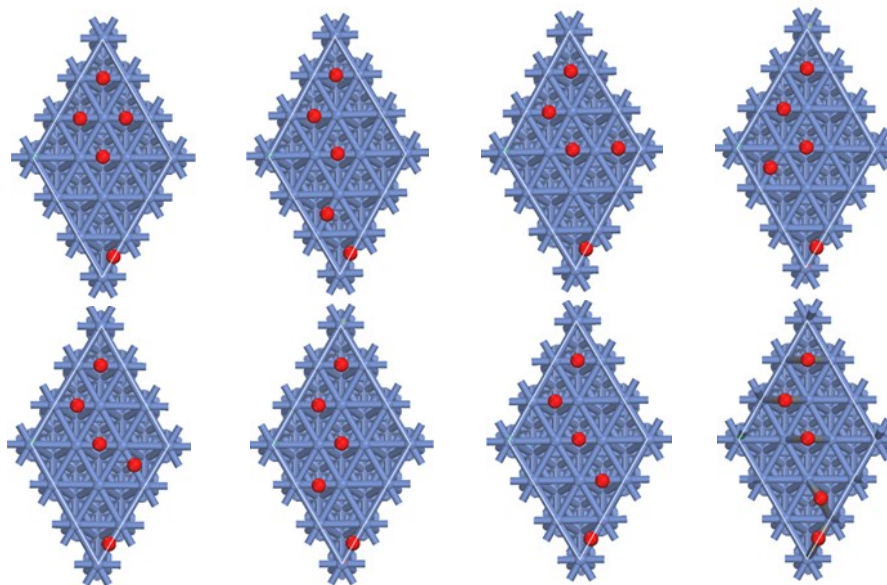

Initial structures

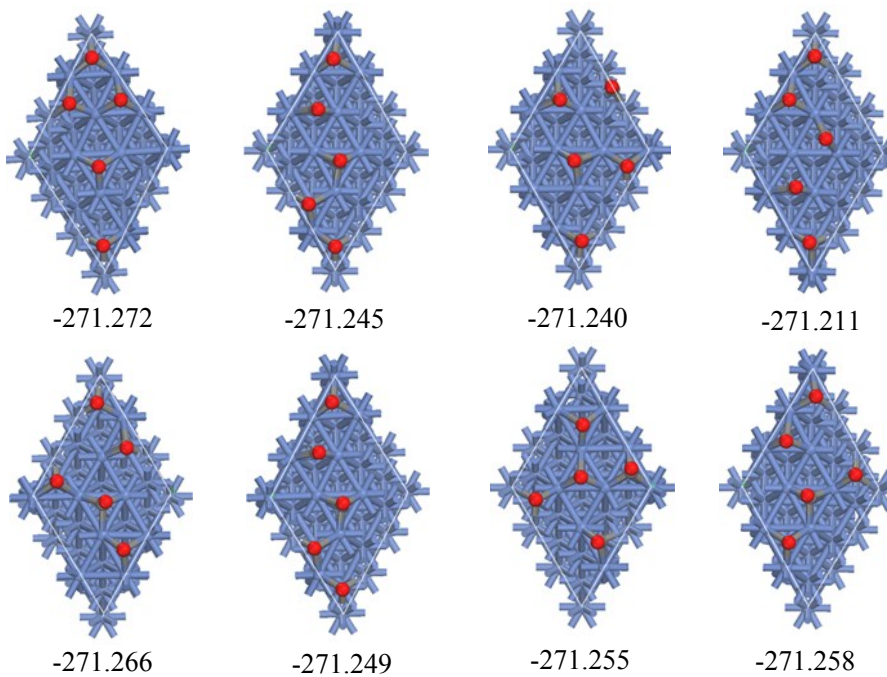

Optimized structures

(2) The corresponding structures at the Hcp and Fcc site respectively

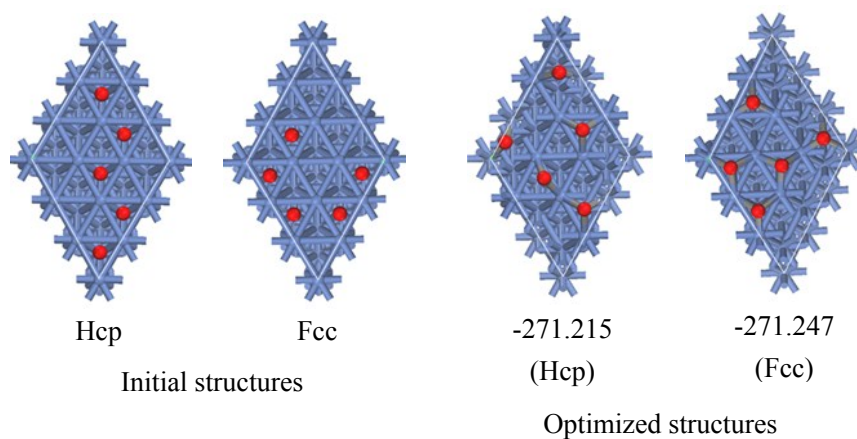

(3) The corresponding structures at the Top site

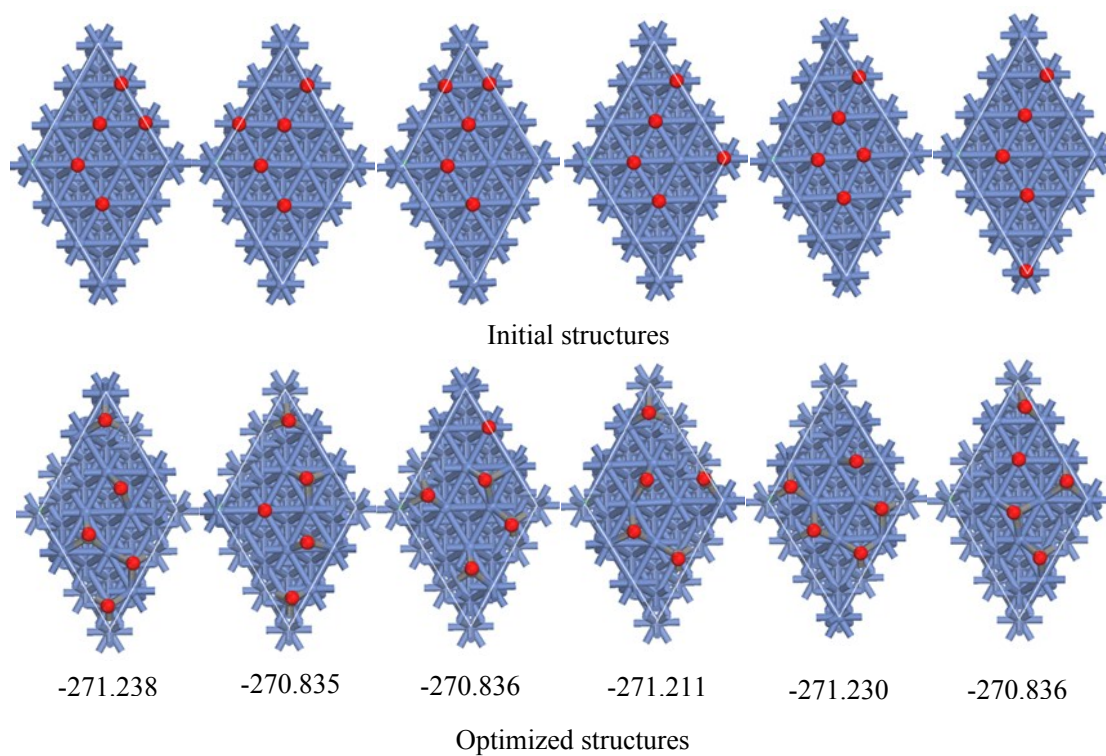

(e) CO Adsorption at different sites at the coverage of 5/9 ML

(1) The corresponding structures at the Hcp and Fcc site respectively

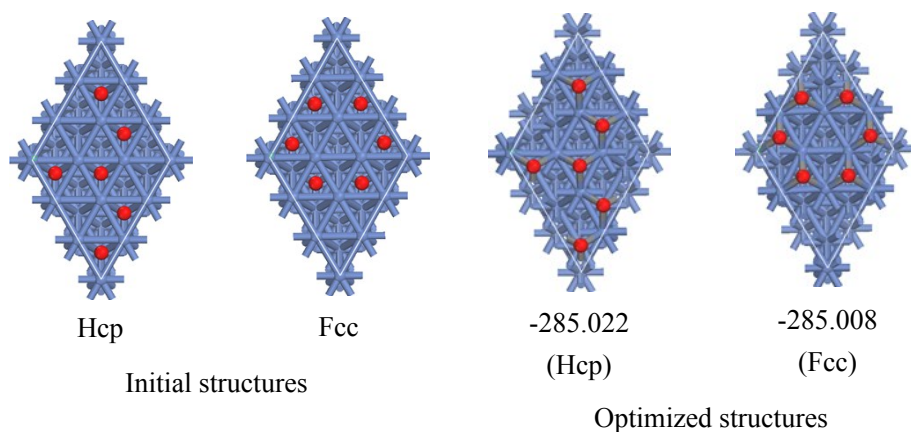

(2) The corresponding structures at the Bridge site

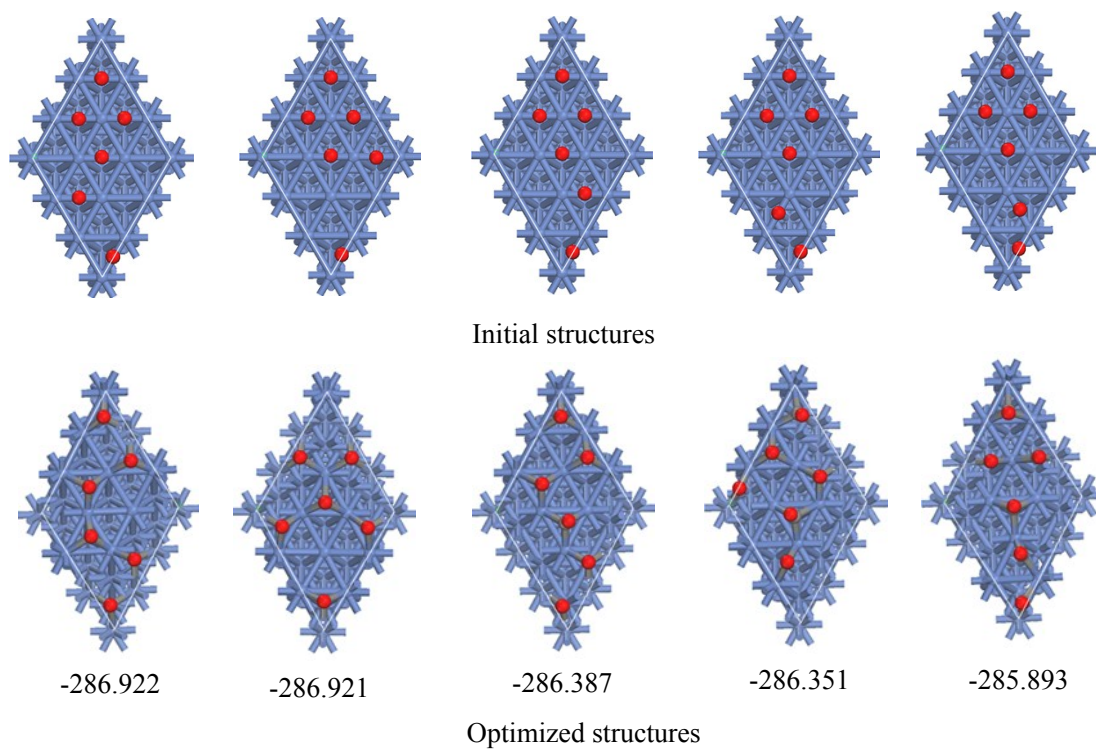

(3) The corresponding structures at the Top site

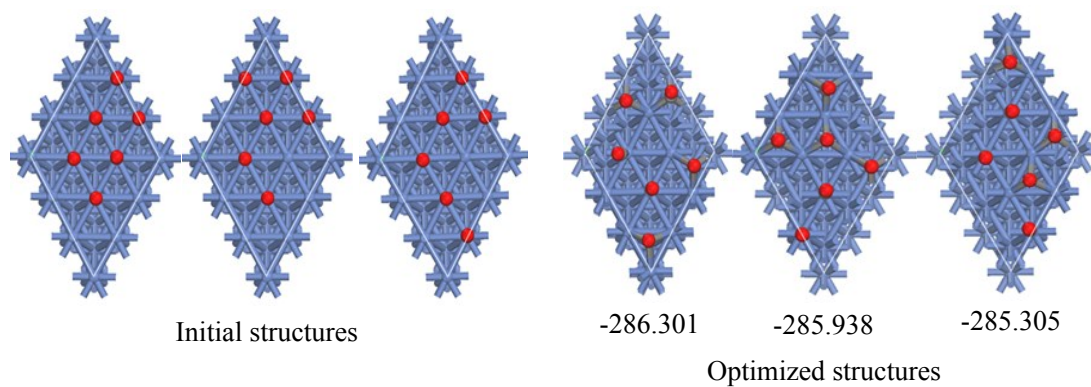

(f) CO Adsorption at different sites at the coverage of 6/9 ML

(1) The corresponding structures at the Hcp and Fcc site respectively

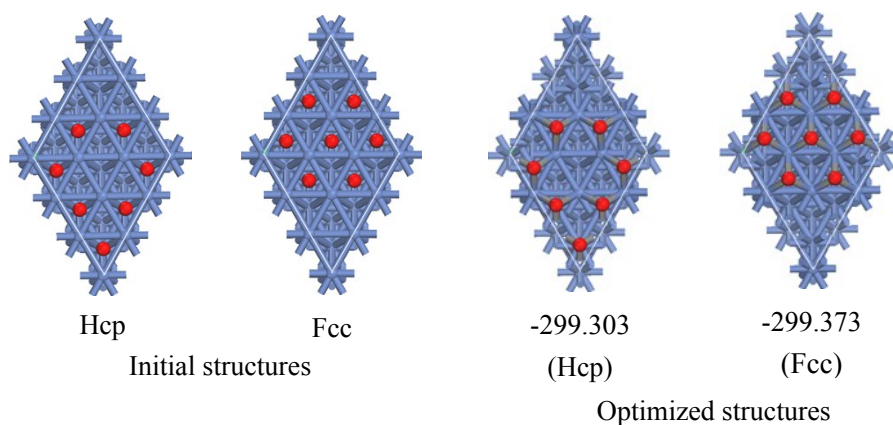

(2) The corresponding structures at the Bridge site

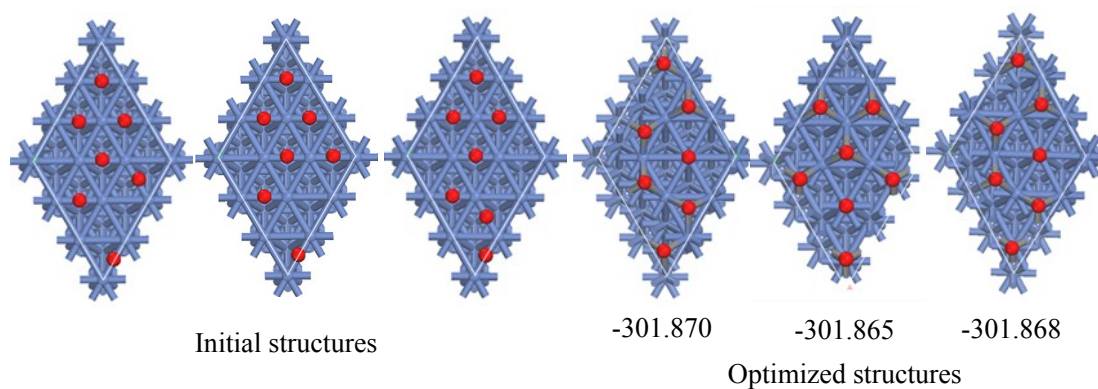

(3) The corresponding structures at the Top site

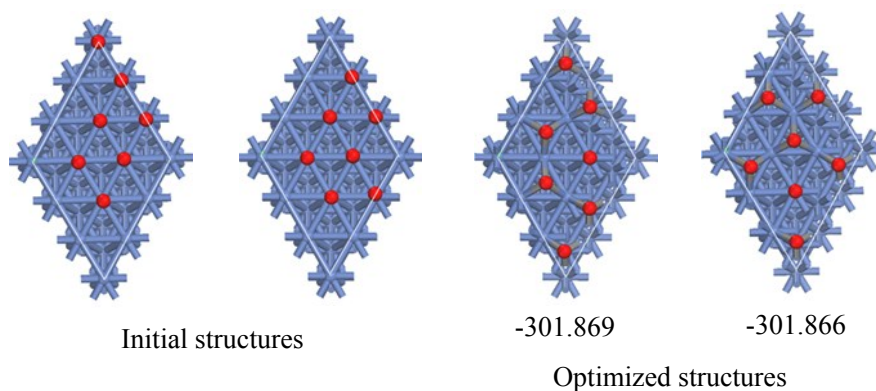

(g) CO Adsorption at different sites at the coverage of 7/9 ML

(1) The corresponding structures at the Hcp and Fcc site respectively

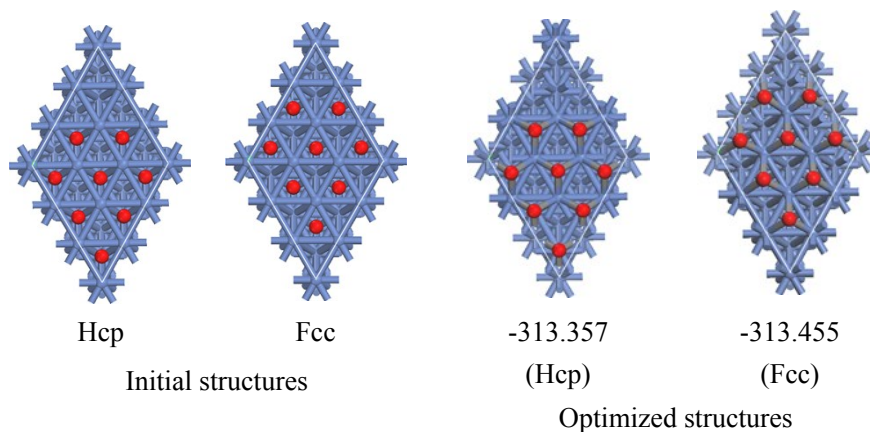

(2) The corresponding structures at the Bridge site

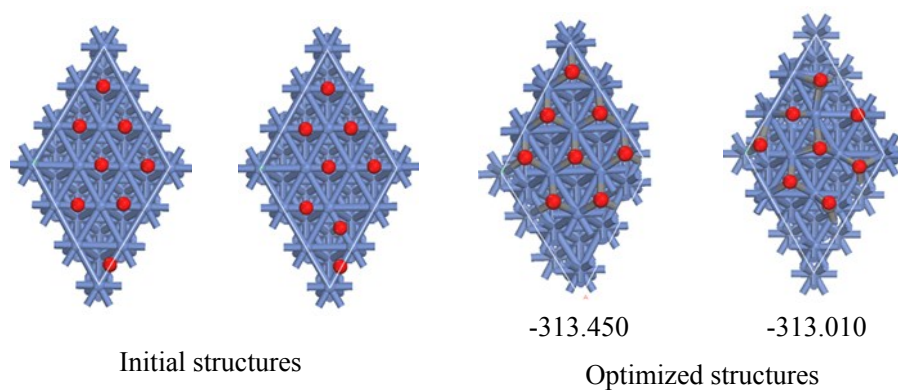

(3) The corresponding structures at the Top site

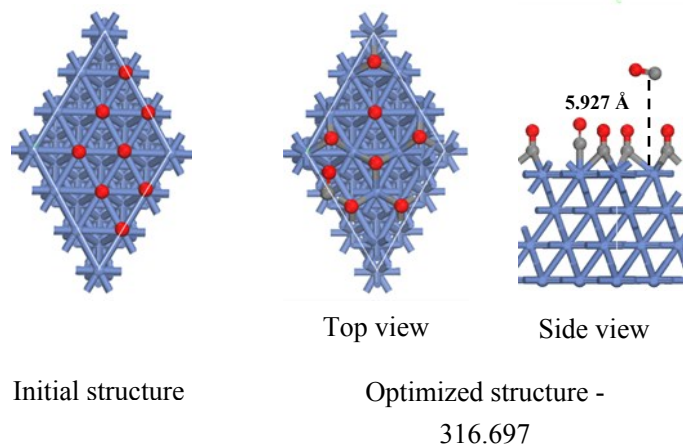

(h) CO Adsorption at different sites at the coverage of 8/9 ML

(1) The corresponding structures at the Hcp and Fcc site respectively

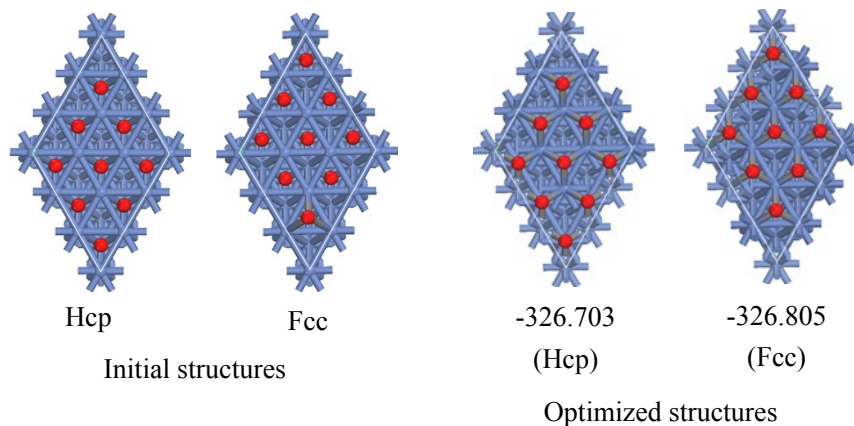

(2) The corresponding structures at the Bridge and Top site respectively

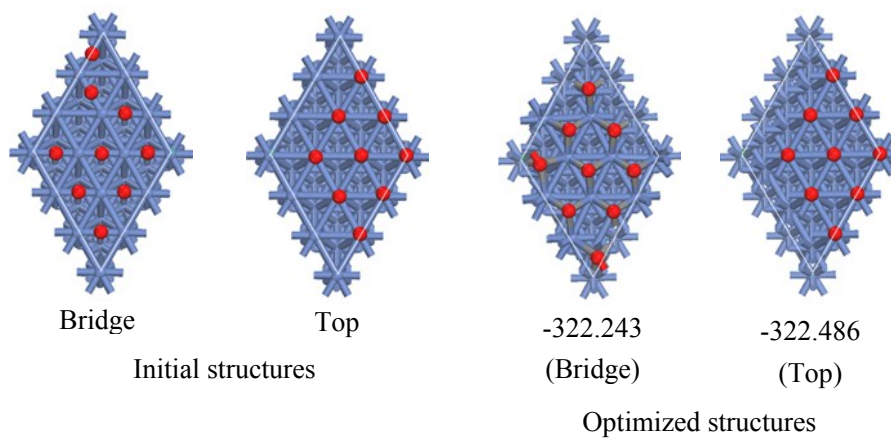

(i) CO Adsorption at different sites at the coverage of 9/9 ML

**Figure S3** The computed structures and total energy (eV) with adsorbed CO molecules on Ni(100) surface at different coverage. The blue, grey and red balls stand for Ni, C and O atoms, respectively. Zero-point energy corrections, thermal energy corrections and entropies are not included.

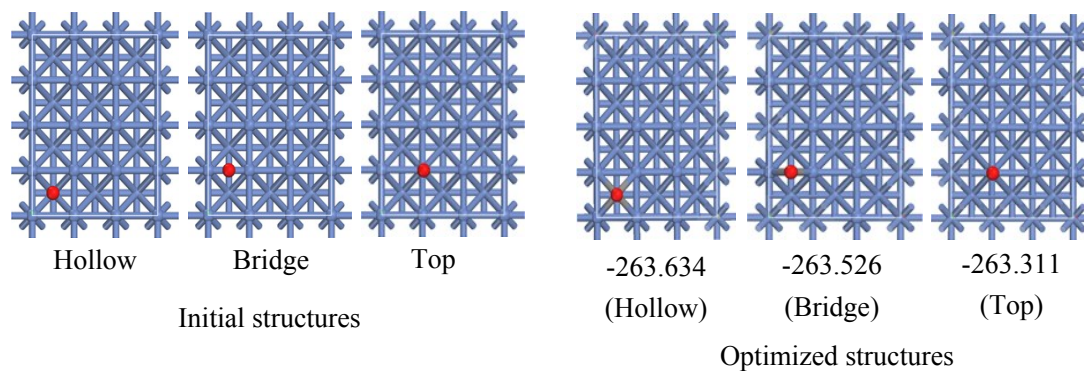

**(a)** CO Adsorption at different sites at the coverage of 1/12 ML

(1) The corresponding structures at the Hollow site

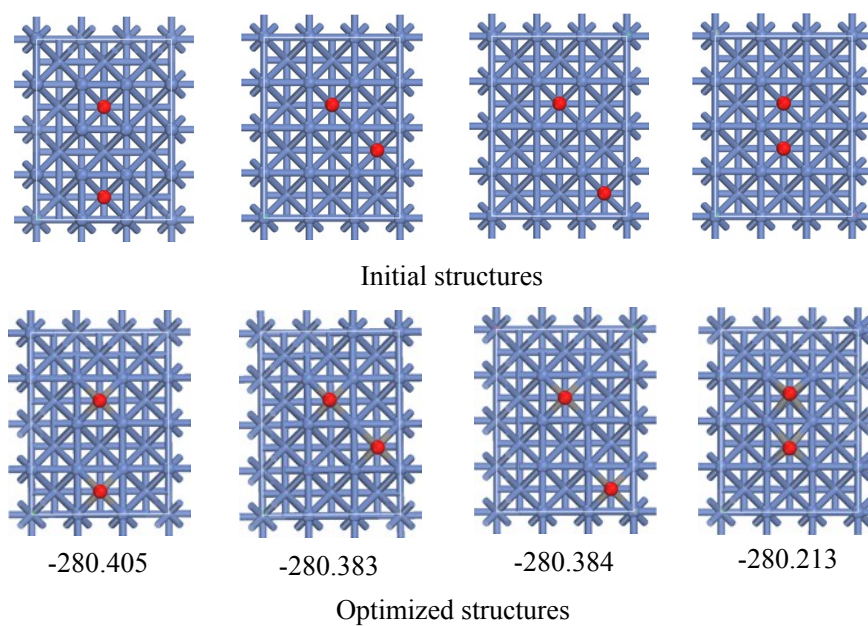

(2) The corresponding structures at the Bridge site

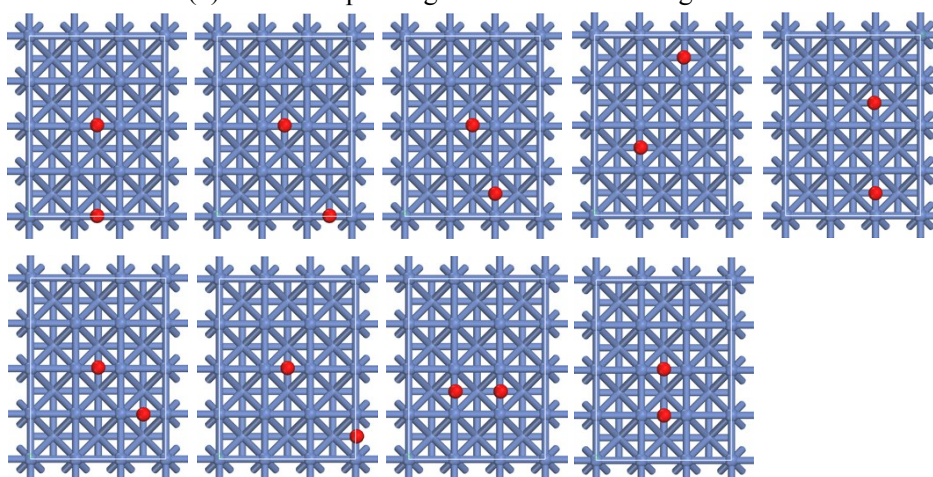

Initial structures

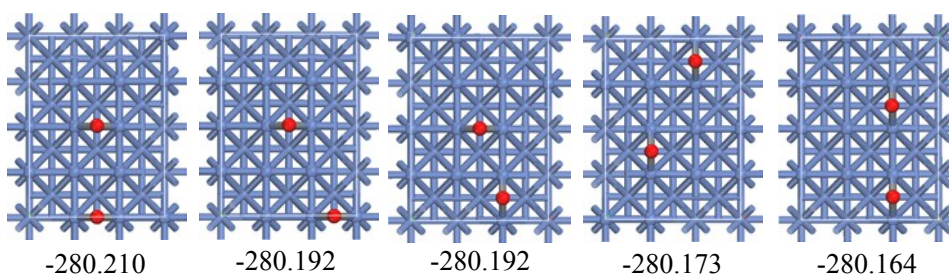

-280.210

-280.192

-280.192

-280.173

-280.164

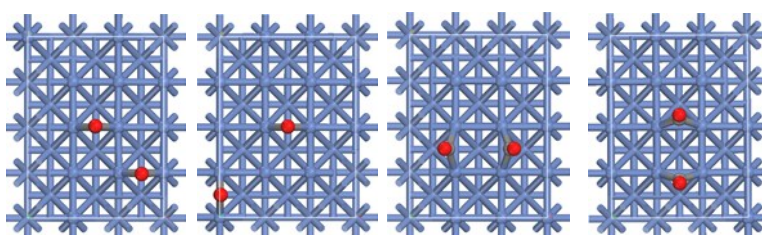

-280.161

-280.154

-280.151

-280.115

Optimized structures

(3) The corresponding structures at the Top site

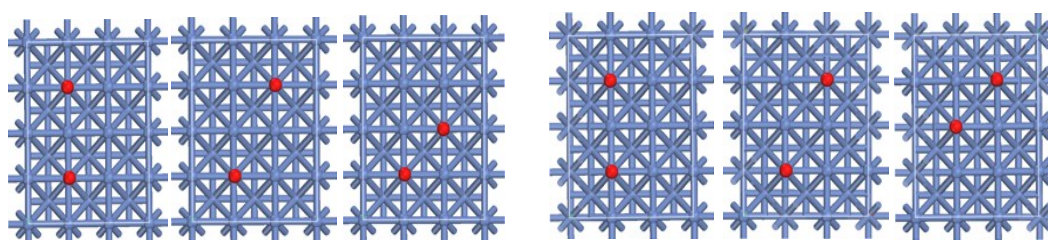

Initial structures

-279.795

-279.764

-279.742

Optimized structures

(b) CO Adsorption at different sites at the coverage of 2/12 ML

(1) The corresponding structures at the Hollow site

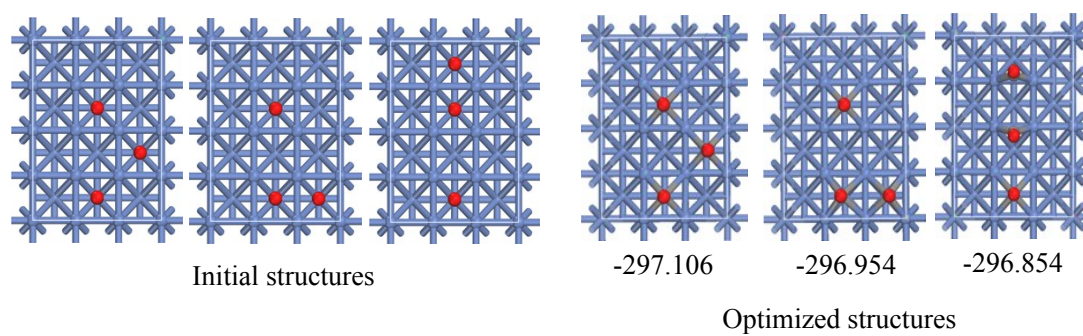

(2) The corresponding structures at the Bridge site

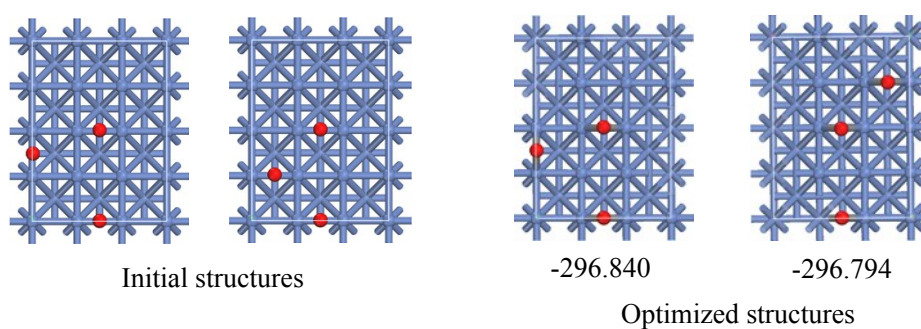

(3) The corresponding structures at the Top site

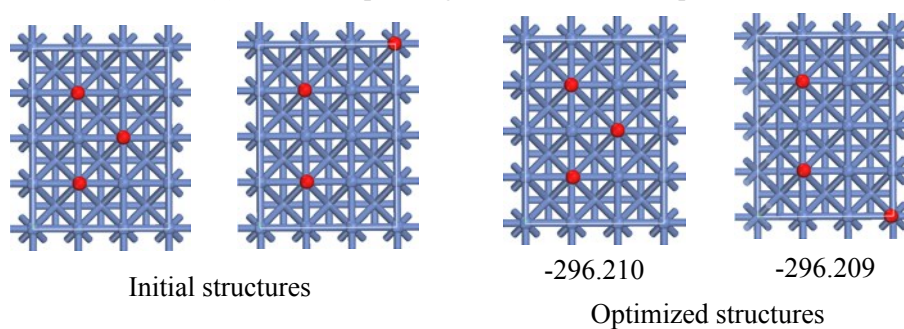

(c) CO Adsorption at different sites at the coverage of 3/12 ML

(1) The corresponding structures at the Hollow site

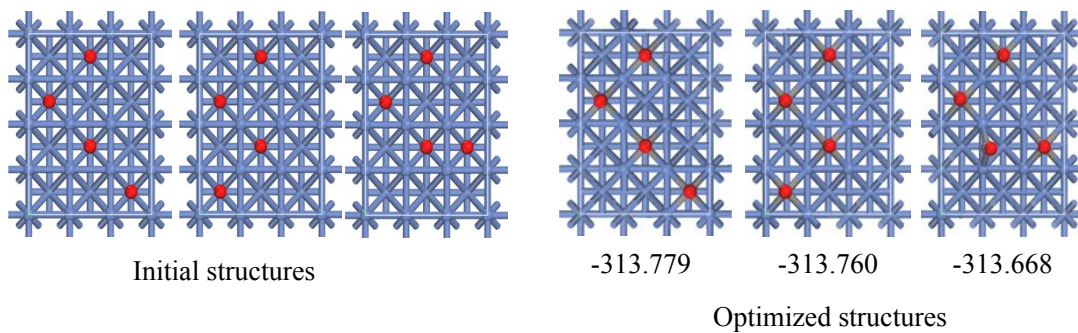

(2) The corresponding structures at the Bridge site

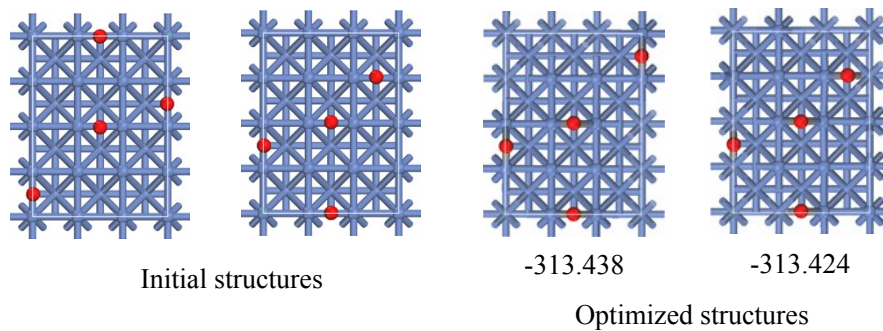

(3) The corresponding structures at the Top site

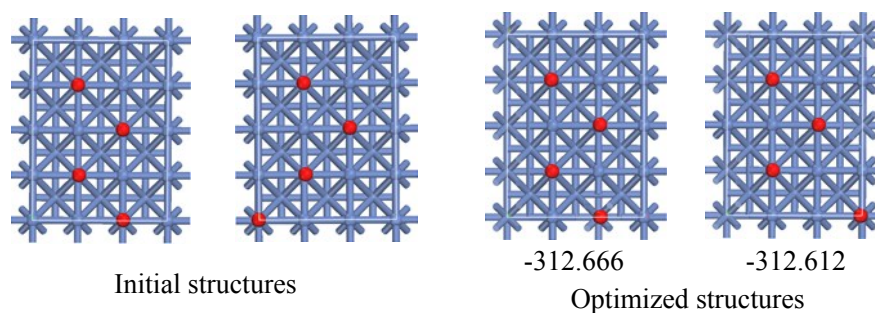

(d) CO Adsorption at different sites at the coverage of 4/12 ML

(1) The corresponding structures at the Hollow site

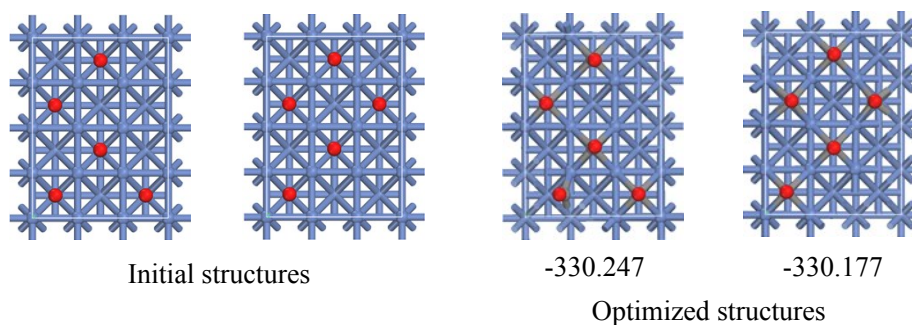

(2) The corresponding structures at the Bridge site

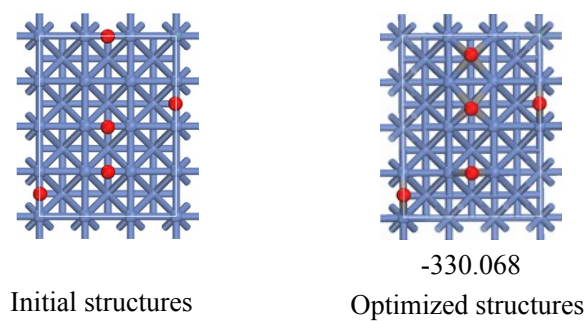

(3) The corresponding structures at the Top site

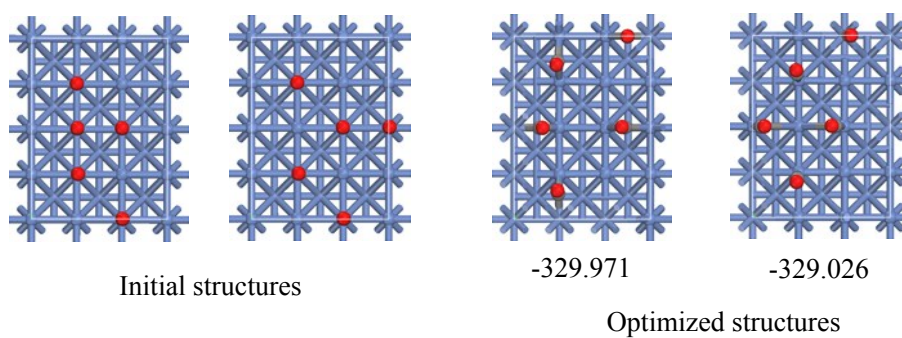

(e) CO Adsorption at different sites at the coverage of 5/12 ML

(1) The corresponding structures at the Hollow and Bridge site

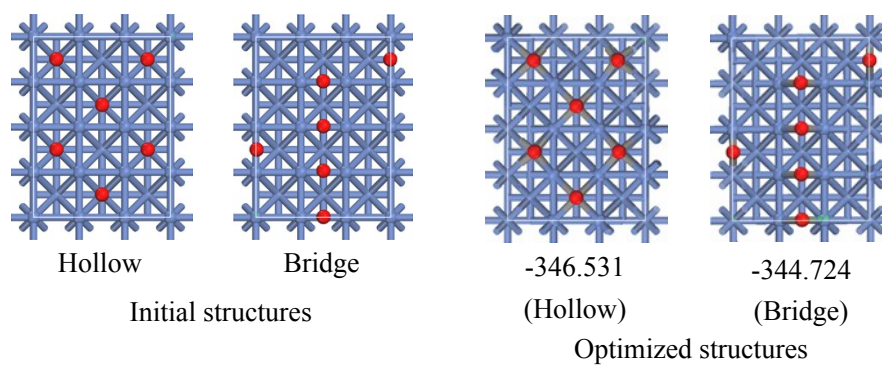

(2) The corresponding structures at the Top site

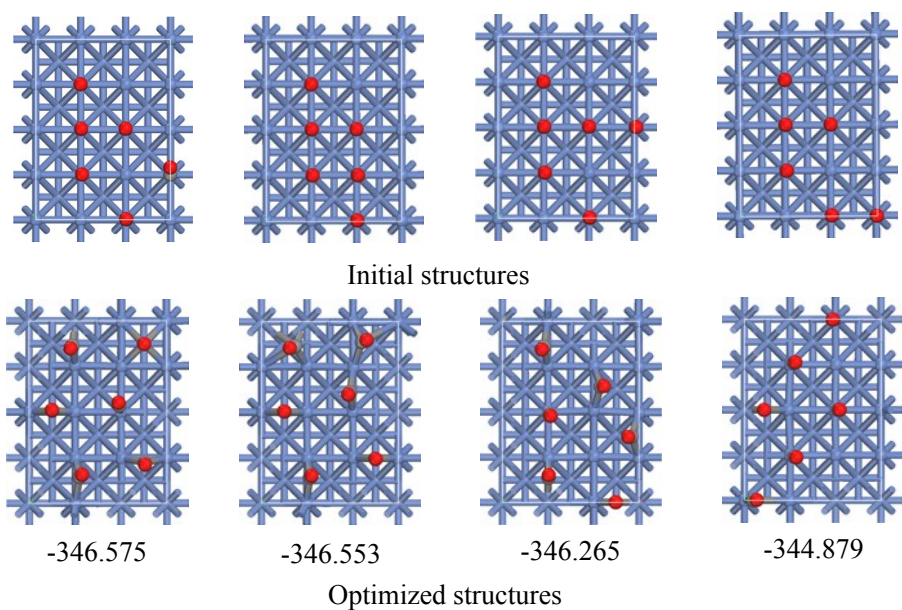

(f) CO Adsorption at different sites at the coverage of 6/12 ML

(1) The corresponding structures at the Hollow site

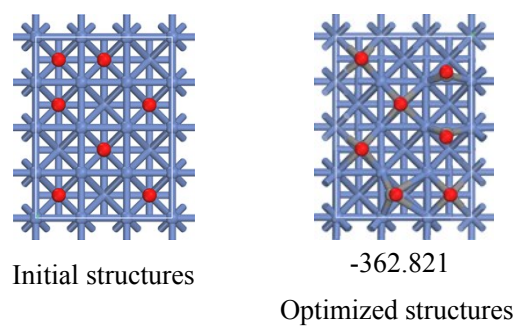

(2) The corresponding structures at the Bridge site

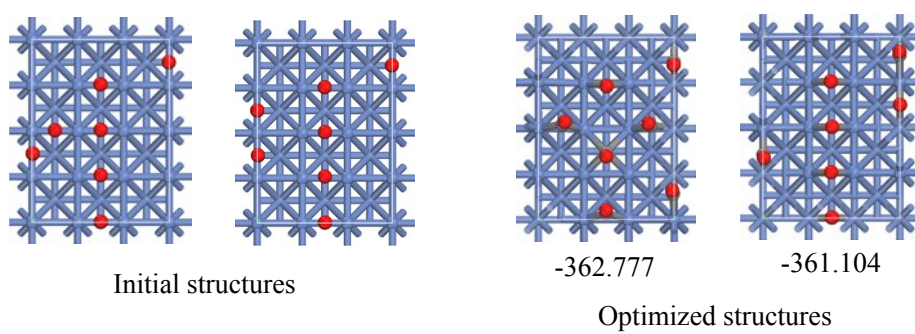

(3) The corresponding structures at the Top site

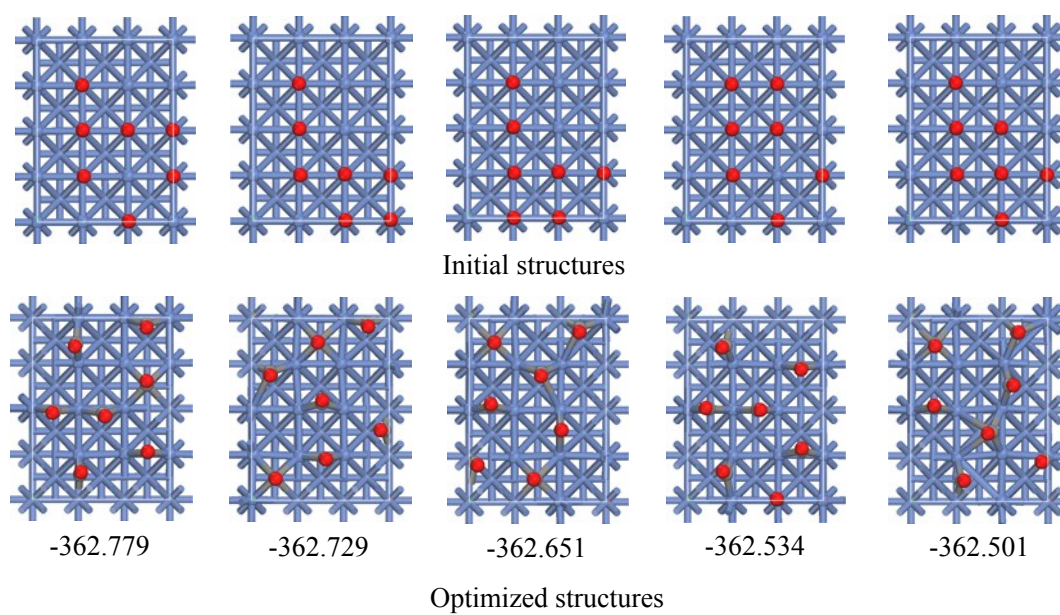

(g) CO Adsorption at different sites at the coverage of 7/12 ML

(1) The corresponding structures at the Hollow site

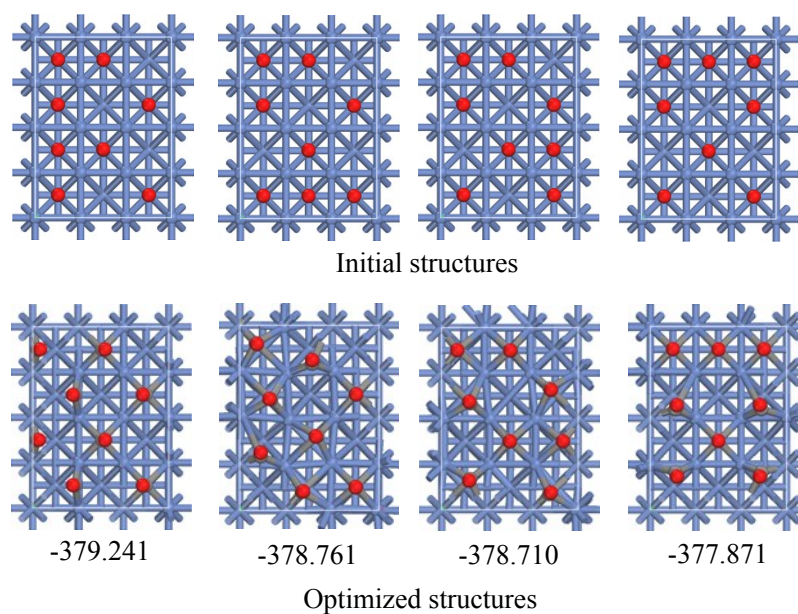

(2) The corresponding structures at the Bridge site

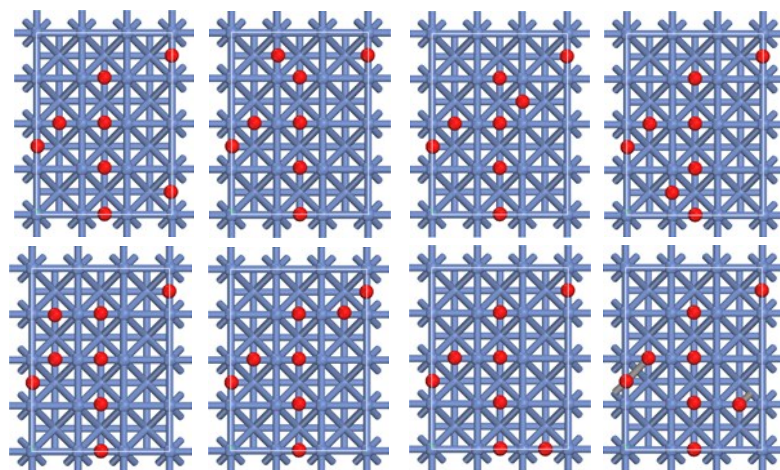

Initial structures

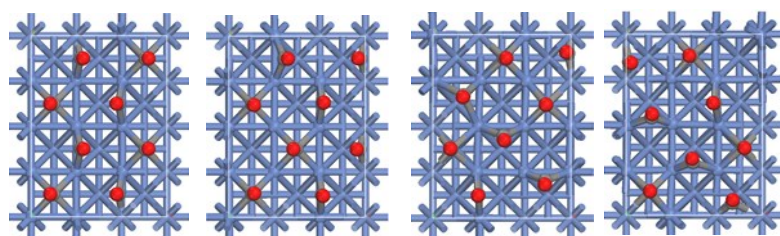

-379.247

-379.156

-378.837

-378.826

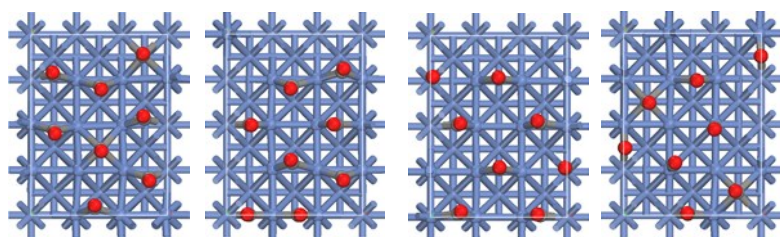

-378.533

-378.510

-378.231

-377.891

Optimized structures

(h) CO Adsorption at different sites at the coverage of 8/12 ML

(1) The corresponding structures at the Hollow site

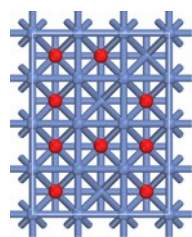

Initial structures

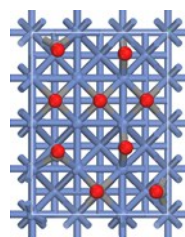

-393.547

Optimized structures

(2) The corresponding structures at the Bridge site

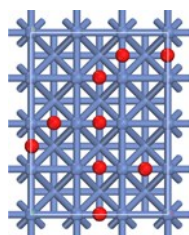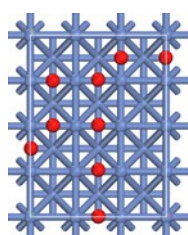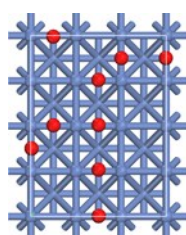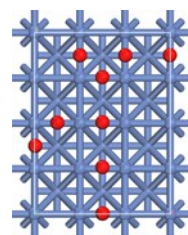

Initial structures

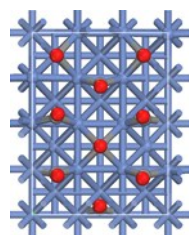

-394.545

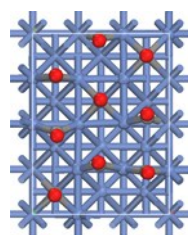

-394.485

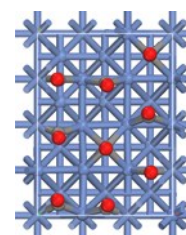

-394.412

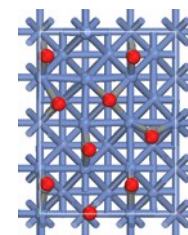

-393.783

Optimized structures

(i) CO Adsorption at different sites at the coverage of 9/12 ML

(1) The corresponding structures at the Hollow site

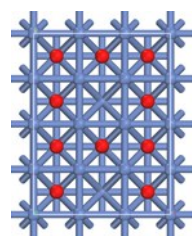

Initial structures

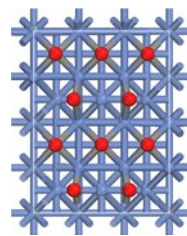

-407.470

Optimized structures

(2) The corresponding structures at the Bridge site

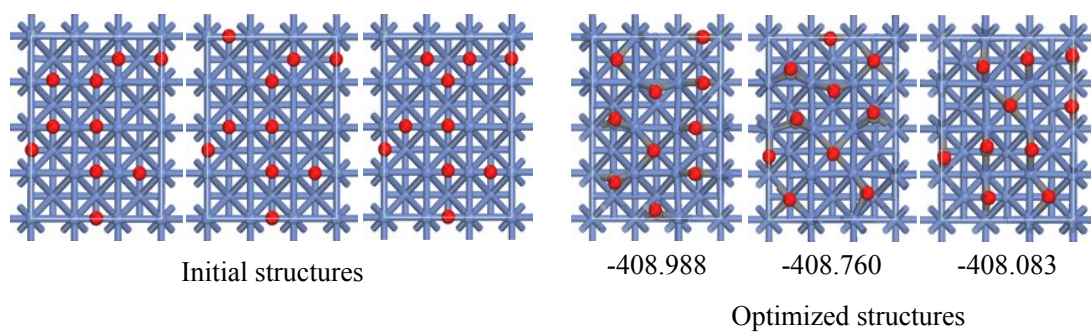

(j) CO Adsorption at different sites at the coverage of 10/12 ML

**Figure S4** The computed structures and total energy (eV) with adsorbed CO molecules on Ni(110) surface at different coverage. The blue, grey and red balls stand for Ni, C and O atoms, respectively. Zero-point energy corrections, thermal energy corrections and entropies are not included.

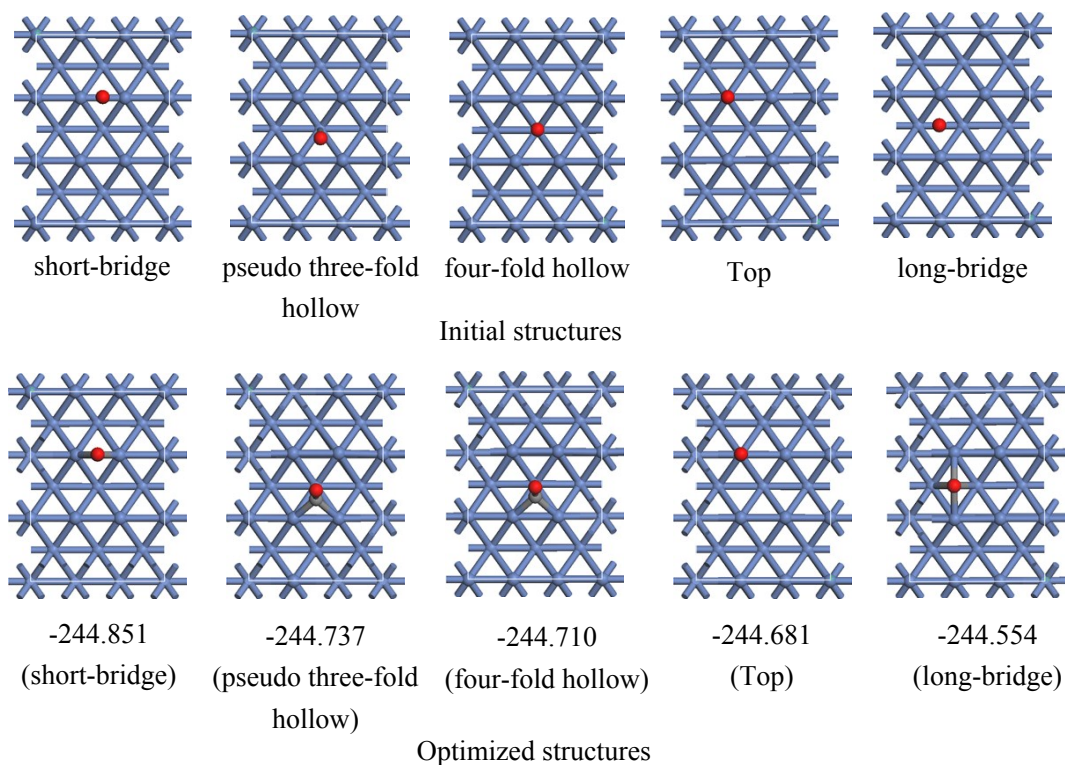

**(a)** CO Adsorption at different sites at the coverage of 1/9 ML

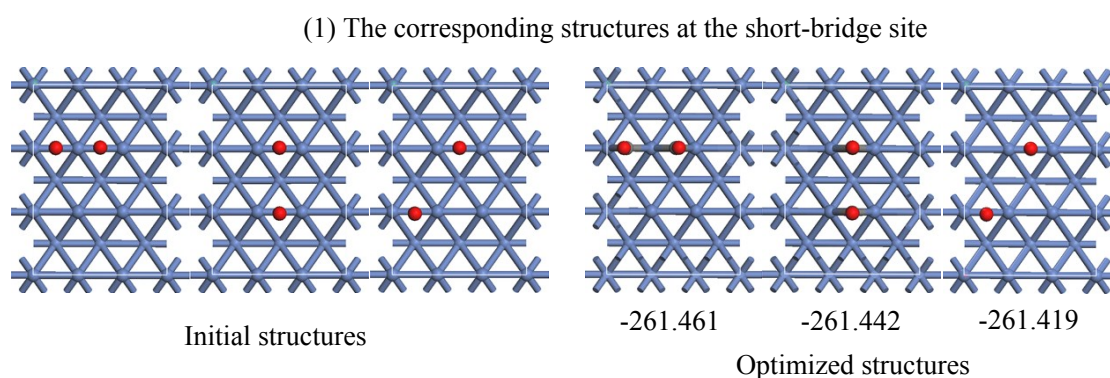

**(b)** CO Adsorption at the coverage of 2/9 ML

(1) The corresponding structures at the short-bridge site

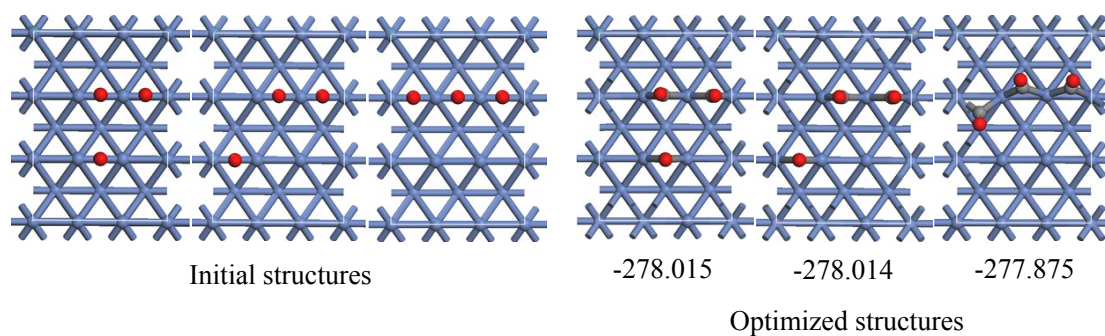

(c) CO Adsorption at the coverage of 3/9 ML

(1) The corresponding structures at the short-bridge site

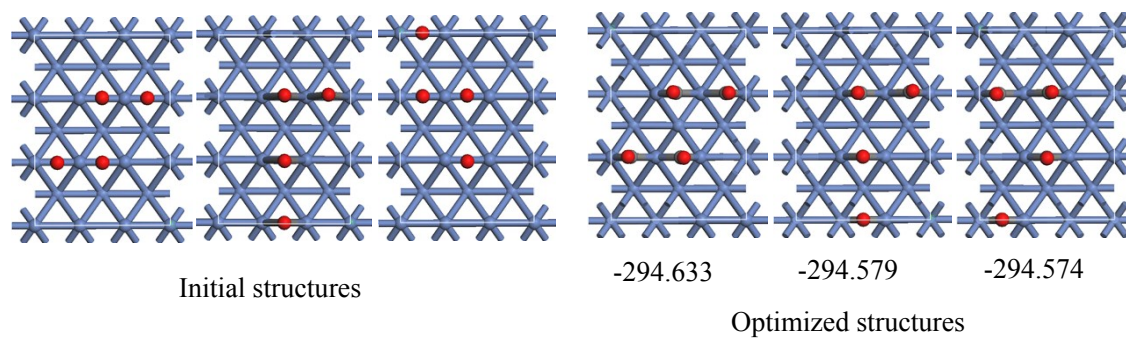

(d) CO Adsorption at the coverage of 4/9 ML

(1) The corresponding structures at the short-bridge site

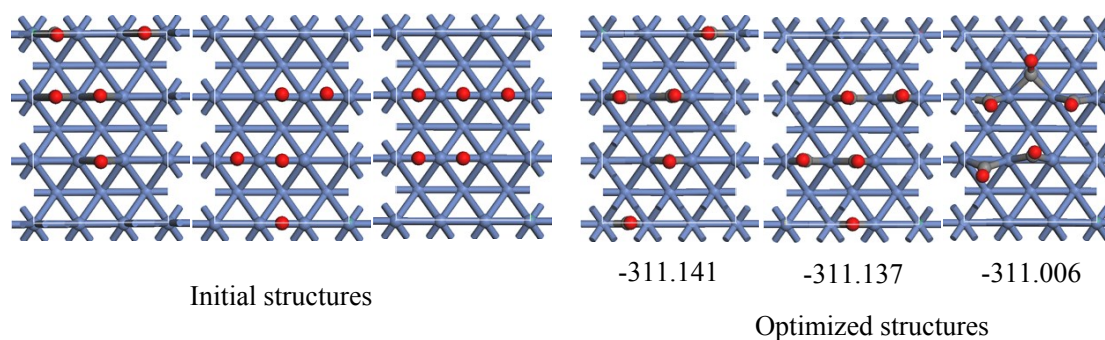

(e) CO Adsorption at the coverage of 5/9 ML

(1) The corresponding structures at the short-bridge site

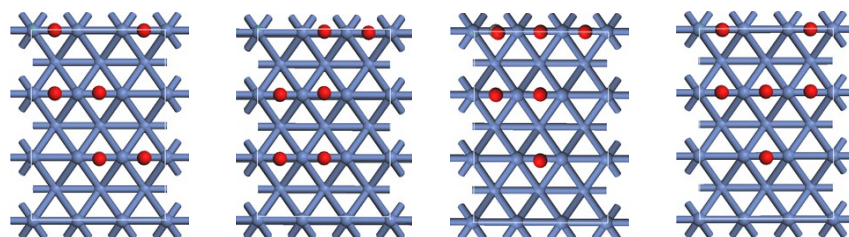

Initial structures

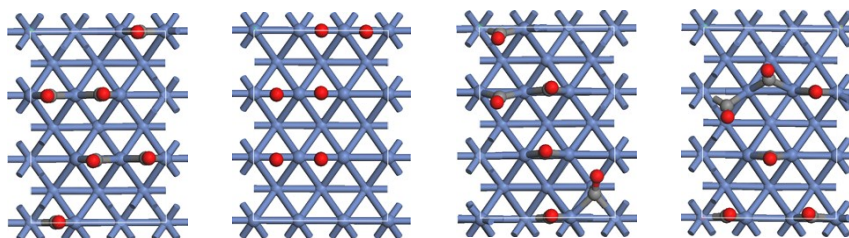

-327.690

-327.682

-327.533

-327.486

Optimized structures

(f) CO Adsorption at the coverage of 6/9 ML

(1) The corresponding structures at the short-bridge site

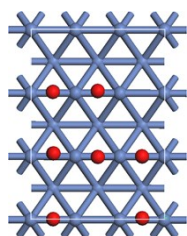

Initial structures

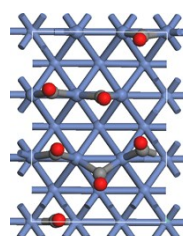

-343.985

Optimized structures

(g) CO Adsorption at the coverage of 7/9 ML

(1) The corresponding structures at the short-bridge site

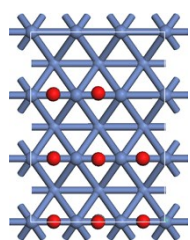

Initial structures

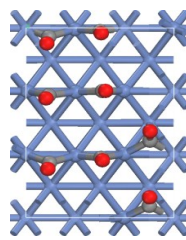

-360.102

Optimized structures

**(h)** CO Adsorption at the coverage of 8/9 ML

(1) The corresponding structures at the short-bridge site

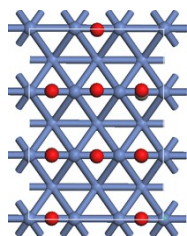

Initial structures

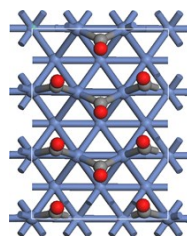

-376.309

Optimized structures

**(i)** CO Adsorption at the coverage of 9/9 ML

**Figure S5** The computed structures of initial states (ISs), transition states (TSs) and final states (FSs) involved in the dissociations of CO molecules on Ni(111) surface at different coverage.

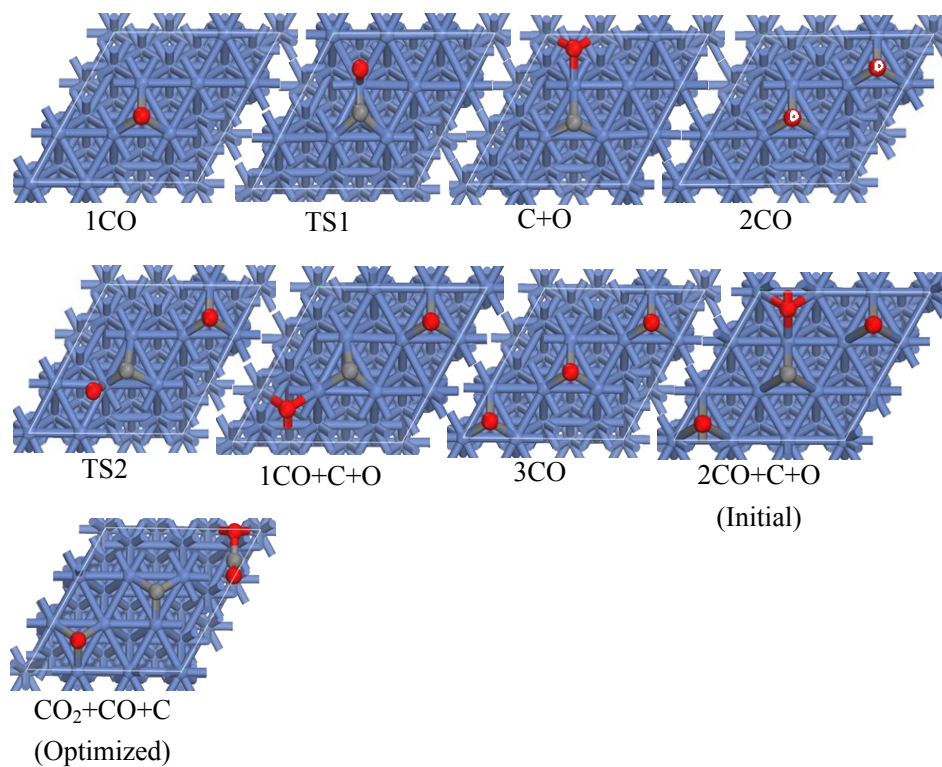

**Figure S6** The computed structures of initial states (ISs), transition states (TSs) and final states (FSs) involved in the dissociations of CO molecules on Ni(100) surface at different coverage.

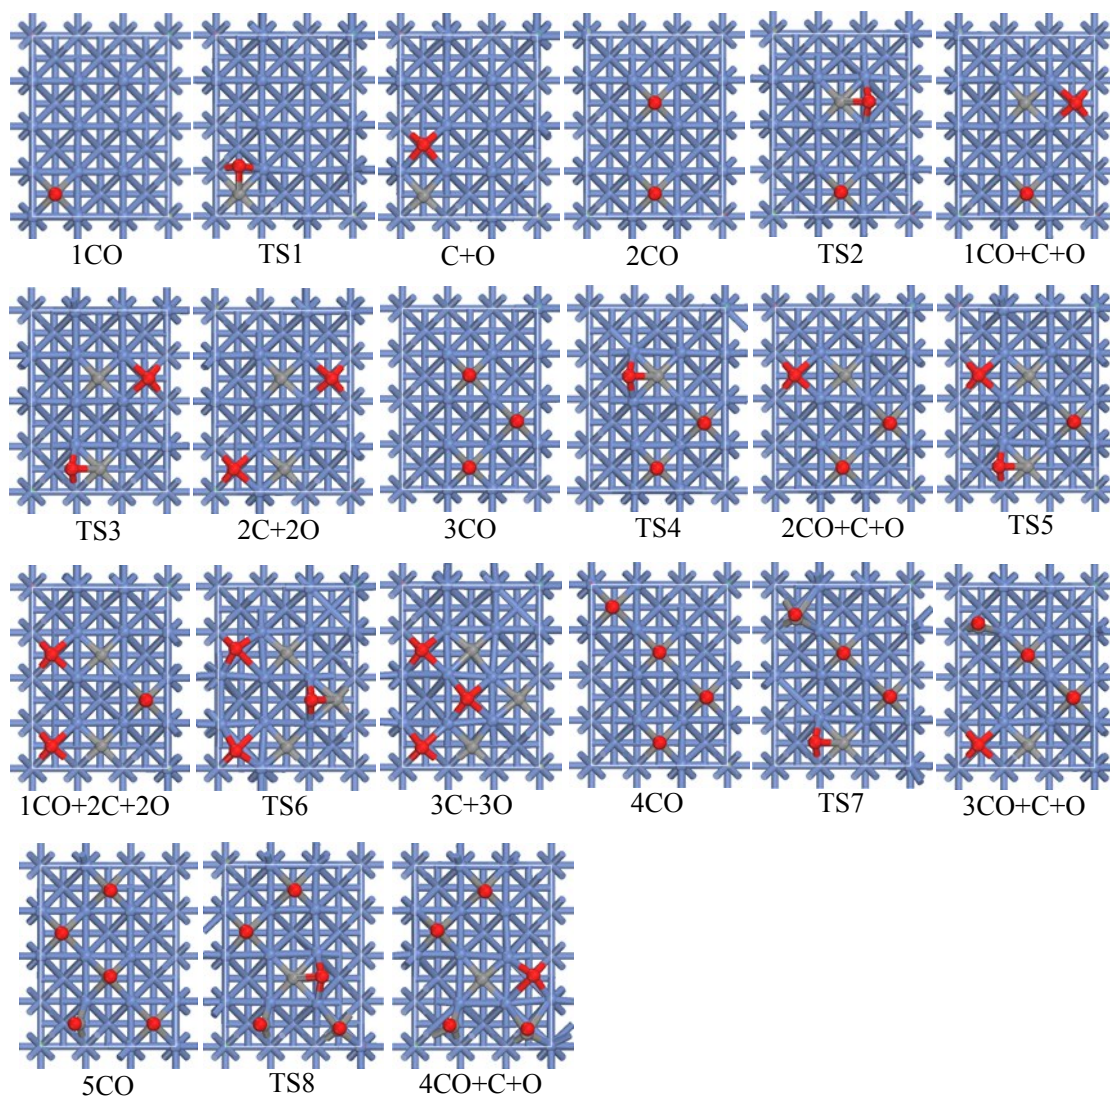

**Figure S7** The computed structures of initial states (ISs), transition states (TSs) and final states (FSs) involved in the dissociations of CO molecules on Ni(110) surface at different coverage.

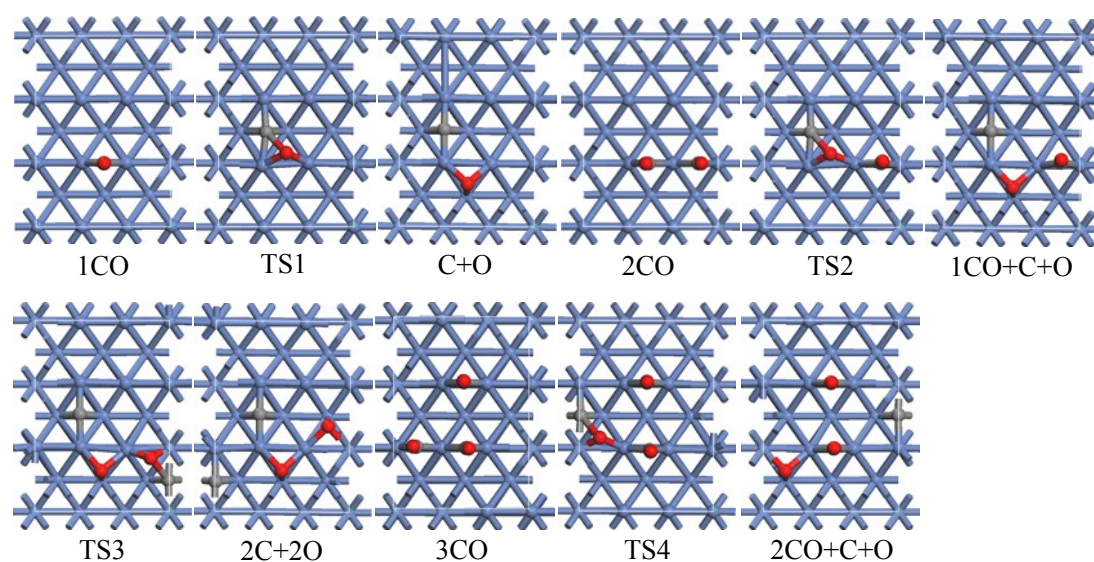

Supplement: c6cp01689h1.pdf [file c6cp01689h1.pdf]
